# Supplementary material for: Stratification of enterochromaffin cells by single-cell expression analysis
Source: eLife. 2025 Apr 4;12:RP90596. doi: 10.7554/eLife.90596 (PMC11970908; doi:10.7554/eLife.90596)
Supplement: Figure 3—source data 1. [file elife-90596-fig3-data1.xlsx]

## Sheet: Source data Fig 3
gene_name	AAACCTGTCAACGAAA-1_EC	AAACGGGCAAAGGCGT-1_EC	AAACGGGGTCGCATAT-1_EC	AAACGGGGTCGTTGTA-1_K	AAACGGGGTCTCTTTA-1_EC	AAACGGGTCATGCAAC-1_EC	AAACGGGTCGCCAAAT-1_EC	AAAGATGCACGGTTTA-1_EC	AAAGATGCATGTCCTC-1_EC	AAAGATGCATTAGGCT-1_EC	AAAGATGGTGATGCCC-1_EC	AAAGATGTCAGGTAAA-1_Cck/Tph1	AAAGATGTCAGTACGT-1_EC	AAAGCAAAGACTTGAA-1_Cck/Tph1	AAAGCAAAGTACGCGA-1_EC	AAAGCAACAGTCGTGC-1_EC	AAAGCAAGTCTTGTCC-1_EC	AAAGTAGCAAGCCATT-1_EC	AAATGCCAGATGAGAG-1_EC	AAATGCCAGTGGCACA-1_EC	AAATGCCCAAAGTCAA-1_EC	AAATGCCCAGGCTGAA-1_K	AAATGCCCAGTGGAGT-1_EC	AAATGCCCATCATCCC-1_EC	AAATGCCGTTAAGGGC-1_L	AAATGCCTCTAAGCCA-1_K	AACACGTGTCAAAGAT-1_EC	AACACGTGTTACCGAT-1_EC	AACACGTTCGCCAAAT-1_EC	AACACGTTCTGAAAGA-1_Cck/Tph1	AACCATGCAGGACGTA-1_Cck/Tph1	AACCATGGTCTAAACC-1_K	AACCATGTCCTATTCA-1_EC	AACCGCGAGAGAACAG-1_Cck/Tph1		AACCGCGGTACAGTTC-1_Cck/Tph1	AACCGCGGTCCCGACA-1_EC	AACCGCGTCGAGAACG-1_EC	AACGTTGAGAAGGTGA-1_EC	AACGTTGAGACTAAGT-1_EC	AACGTTGAGACTCGGA-1_EC	AACGTTGCAGCATACT-1_EC	AACGTTGTCACCATAG-1_X	AACTCAGAGTCTCAAC-1_EC	AACTCAGTCTTAGCCC-1_Cck/Tph1	AACTCCCAGAGTACAT-1_EC	AACTCCCCAAGTCATC-1_K	AACTCCCGTGTGACCC-1_Cck/Tph1	AACTCCCTCTCGCATC-1_K
Trpa1	3.5493	0	0	1.0584	0	0	0	0.934753	0	0	0	0	2.79817	0	1.64601	0	0	0	1.31581	0	0	0	2.10393	3.43031	0	0	0	0	1.0377	0	0	0	0	0	1.03014	0	0	2.88938	0	1.86742	0.85321	0	0	0	0	0	0	0	0
Gpbar1	0	0	0	0	0	0	0	0	0	0	0	0	0	0	0	0	0	0	0	0	0	0	0	0	0	0	0	0	0	0	0	0	0	0	0	0	0	0	0	0	0	0	0	0	0	0	0	0	0
Gpr119	0	0	0	0	0	0	0	0	0	0	0	0	1.13166	0	0	0	0	0	0	0	0	1.29702	0	0	0.702842	0	0	0	0	0	0	0.715686	0	0	0	0	0	0	0	0	0	0	0	0	0	0	0.998279	0	0
Trpc4	0	0	1.44886	0	0.834651	1.5513	0	0	0	0	0	0	0	0	1.64601	0	1.25875	0	0	0	0	0	0	0.984056	0	0	0	0	0	0	0	0	0	0	0	0	0	0	1.13468	0.912982	0	0	0	0	0	1.00974	0	0	0
Asic5	0	0	1.44886	0	1.36	0	0	0	1.38522	0	0	0	0	0	0	2.78131	2.71623	0	0	0	0	0	0	0	0	0	0	0	0	0	0	0	0	0	0	0	0	0	0	0.912982	0	0	0	0	0	1.59794	0	0	0
Cnr1	0	0	0	1.66231	0	0	0	0.934753	0	0	0	0	1.75797	0	0	0	0	0	0	0	0	0	0	0	0	1.63718	0	0	0	0	0	1.1919	0	0	0	0	0	0	0	0	0	0	0	0	0	0	0.998279	0	1.67047
Hcar2	0	0	0	0	0	0	0	0	0	0	0	0	0	0	0	0	0	0	0	0	0	0	0	0	0	0	0	0	0	0	0	0	0	0	0	0	0	0	0	0	0	0	0	0	0	0	0	0	0
Hcar1	0	0	0	0	0	0	0	0	0	0	0	0	0	0	0	0	0	0	0	0	0	0	0	0	0	0	0	1.99645	0	0	0	0	0	0	0	0	0	0	0	0	0	0	0	0	0	0	0	0	0
Gper1	0	0	0	0	0	0	0	0	0	0	0	0	0	0	0	0	0	0	0	0	0	0	0	0	0	0	0	0	0	0	0	0	0	0	0	0	0	0	0	0	0	0	2.44963	0	0	0	0	0	0
Ffar2	0.980657	2.90244	1.44886	0.624156	1.74428	0	0	1.90099	1.38522	2.26069	0	1.55857	2.52718	1.28006	2.88538	2.29764	2.37258	0	0	1.70612	0	0	1.07011	0	0.702842	0	2.55732	0	0	0	3.16599	0	2.95116	1.37226	0	1.47581	1.8076	0	0	1.46773	1.38573	2.3649	0	1.74156	0.725418	2.01459	0	1.66816	0
Ffar3	0	0	0	0	0	0	0	0	0	0	0	0	0	0	0	0	0	0	0	0	0	0.789609	0	0	0	0	0	0	0	0	0.735198	0.715686	0	0	0	0	0	0	0	0	0	0	0	0	0	0	0	0	1.0646
Ffar1	0.980657	0	0	0	0	0	0	0	0	0	0	0.980254	0	0.777573	0	0	0	0	0	0	0	1.9688	0	0	1.81181	0	0	0	0	0	1.21987	0.715686	0	2.52764	0	0	0	0	0	0	0	0	0	0	0	0	0.998279	1.66816	0
Olfr558	0	0	0	0	0	0	0	0	0	0	0	0	0	0	0	0	0	0	0	0	0	0	0	0	0	0	0	0	0	0	0	0	0	0	0	0	0	0	0	0	0	0	0	0	0	0	0	0	0
Olfr78	0	0	0	0	0	0	0	0	0	0	0	0	0	0	0	0	0	0	0	0	0	0	0	0	0	0	0	0	0	0	0	0	0	0	0	0	0	0	0	0	0	0	0	0	0	0	0	0	0
Gpr6	1.55911	0	0	0	0	1.5513	1.47514	0	0	0	1.42558	0	0	0	1.64601	0	0	0	0	0	0	0	0	0.984056	0.702842	0	0	0	1.0377	0	0	0	0	0	0	0	0	0	1.13468	0	0.85321	1.62086	1.47773	0	0	0	0	0	0
Trpm2	0	2.08353	1.44886	0	0	1.5513	1.47514	1.49729	1.38522	3.62954	1.42558	0	0	0	1.64601	1.56475	2.37258	3.65432	1.31581	0	1.5922	0	0	1.56366	0	0	2.55732	0	1.63501	0	0	0	1.69803	0	0	0	1.17011	0	1.76188	2.18006	1.77381	1.62086	0	0	0	0	0	0	0
Stra6	0	0	0	0	0	0	0	0	0	0	0	0	0	0	0	0	0	0	0	0	0	0	0	0	0	0	0	0	0	0	0	0	0	0	0	0	0	0	0	0	0	0	0	0	0	0	0	0	0
Trpc1	0	0	0	0.624156	0	0	0	0	0	0	0	0	0	0	0	1.56475	1.25875	0	0	0	0	1.67166	0	0	0	0	0	0	0	0	0	0	0	0	0	0.672472	0	0	0	0	0	0	0	0	0	0	1.58267	0	0
Trpc7	0	0	0	0	0	0	0	0	0	0	0	0	1.13166	0	0	0	0	0	0	0	0	0	0	0	0	0	0	0	0	0	0	0	0	0	0	0	0	1.64916	0	0	0	0	0	0	0	0	0	0	0
Gpr22	0	0	0	0	0	0	0	0	0	0	0	0	0	0	0	0	0	0	0	1.09181	0	0	0	0	0	0	0	0	0	0	0	1.54932	0	0	1.03014	0.672472	0	0	1.13468	0	0	0	0	0	0	1.00974	0.998279	0	1.0646
Casr	0	0	0	0	0	0	0	0	0	0	0	0	0	0	0	0	0	0	0	0	0	0	0	0	0	0	0	0	0	0	0	0	0	0	0	0	0	0	0	0	0	0	0	0	0.725418	0	0	0	0
Piezo2	0	0	0	0	0	0	0	0	0	0	0	0	0	0	0	0	0	0	0	0	0	0	0	0	0	0	0	0	0	0	0	0	0	0	0	0	0	0	0	0	0	0	0	0	0	0	0	0	0
Mc4r	0	0	0	0	0	0	0	0	0	0	0	0.980254	0	0	0	0	0	0	0	0	0	0	0	0	0	0	0	0	0	2.22093	1.21987	0	0	0	0	0.672472	0	0	0	0	0	0	0	0	0.725418	0	0	0	0
Ffar4	0	0	0	0	0	0	0	0	0	0	0	1.55857	0	0.777573	0	0	0	0	0	0	0	0	0	0	0	0	0	0	0	0	0	0.715686	0	0	0	0	0	0	0	0	0	0	0	0	0.725418	0	0.998279	0	0
[truncated: 4,348 more columns]
