# Supplementary material for: Stratification of enterochromaffin cells by single-cell expression analysis
Source: eLife. 2025 Apr 4;12:RP90596. doi: 10.7554/eLife.90596 (PMC11970908; doi:10.7554/eLife.90596)
Supplement: Figure 5—figure supplement 1—source data 1. [file elife-90596-fig5-figsupp1-data1.xlsx]

## Sheet: Source data Figs 1,2 
gene_name	AAACCTGAGAGGTTGC-2_4	AAACCTGCAATTCCTT-2_2	AAACCTGCATGTCGAT-2_2	AAACCTGGTAGCTTGT-2_4	AAACCTGGTTGGTAAA-2_3	AAACGGGAGGACCACA-2_4	AAACGGGAGGGCTTCC-2_2	AAACGGGCAAAGTGCG-2_2	AAACGGGCACAAGTAA-2_3	AAACGGGCACGGCCAT-2_4	AAACGGGCAGGGAGAG-2_5	AAACGGGTCGGAGCAA-2_5	AAACGGGTCGGCTACG-2_2	AAAGATGAGCGACGTA-2_2	AAAGATGCAGTCGTGC-2_3	AAAGATGGTGTTTGTG-2_3	AAAGATGTCTGAAAGA-2_3	AAAGCAACACATGGGA-2_3	AAAGCAAGTTCCATGA-2_3	AAAGCAATCGTCTGCT-2_3	AAATGCCAGACAATAC-2_5	AAATGCCAGAGCAATT-2_5	AAATGCCAGCCAACAG-2_3	AAATGCCAGGACATTA-2_2	AAATGCCAGGCAGTCA-2_3	AAATGCCAGTCGCCGT-2_2	AAATGCCCAAGCCATT-2_5	AAATGCCCAATCCGAT-2_3	AAATGCCGTAAGTAGT-2_1	AAATGCCTCTGCAGTA-2_5	AACACGTAGGATTCGG-2_4	AACACGTCACCACCAG-2_5	AACACGTCACCATGTA-2_6	AACACGTCACGAAAGC-2_2	AACACGTGTAGCAAAT-2_3	AACACGTGTCGACTGC-2_4	AACACGTTCCTGTACC-2_2	AACCATGAGCTACCGC-2_5	AACCATGCATCTACGA-2_4	AACCATGTCACAGGCC-2_5	AACCATGTCCAATGGT-2_3	AACCGCGGTACTTAGC-2_6	AACCGCGTCATTGCGA-2_1	AACCGCGTCTACTTAC-2_6	AACGTTGAGCATCATC-2_5	AACGTTGGTTCAGGCC-2_2	AACGTTGTCCTCAACC-2_5	AACGTTGTCTCACATT-2_2	AACTCAGAGTGTACTC-2_3
Trpa1	1.72423	0	0	1.35977	0	0	0	0	0	2.77128	2.08699	4.68053	0	0	0	2.26279	2.48649	0	0	1.86111	3.20884	3.246	0	0	0	0	3.76033	0	0	4.14251	4.27139	0	0	0	0	3.32953	0	2.81323	2.3577	2.28975	1.79206	2.34149	0	1.38007	2.98477	0	4.61115	1.87336	2.80586
Crp	0	0	0	0	0	0	0	0	0	0	2.08699	0	0	0	0	0	0	0	0	0	0	0	0	2.20825	0	0	0	0	0	0	0	0	0	0	0	0	0	0	0	0	0	0	0	0	0	0	0	0	0
Vim	1.72423	0	0	0	0	0	0	0	1.9521	0	0	0	0	0	2.10474	1.1804	0	0	0	0	1.90638	0	0	0	0	0	1.62847	0	3.5537	4.14251	0	2.68174	0	0	0	0	0	0	0	0	0	0	4.61578	1.38007	0	0	3.51319	0	0
Slc20a1	0	0	0	2.51079	1.63227	0	0	0	0	0	0	0	0	0	0	0	0	1.88728	0	0	0	0	0	0	1.98403	0	1.62847	0	0	0	0	0	0	0	0	2.00634	0	0	0	0	0	0	0	0	0	2.18357	0	0	0
Stmn3	0	0	0	0	0	0	0	0	0	0	0	0	0	0	0	0	0	0	0	0	0	0	0	0	0	0	0	0	0	0	0	0	0	0	0	0	0	0	0	0	0	0	0	0	0	0	0	0	0
Hdac6	0	0	0	0	0	0	0	0	0	0	0	0	0	0	0	0	0	0	0	0	0	0	0	0	0	0	0	0	0	0	0	0	0	0	0	0	0	0	0	0	0	0	0	0	0	0	0	0	0
Il12a	0	0	0	0	0	0	0	0	0	0	0	0	0	0	0	0	0	0	0	0	0	0	0	0	0	0	0	0	0	0	0	0	0	0	0	0	0	0	0	0	0	0	0	0	0	0	0	0	0
Asic5	0	0	2.64677	0	0	0	0	0	0	0	0	0	0	2.25766	0	0	2.48649	1.88728	0	0	0	0	0	0	0	0	0	0	0	0	2.47972	0	0	3.17814	1.56423	0	0	0	0	0	0	0	0	0	0	2.18357	0	0	3.32036
S100a6	0	4.41875	4.06935	4.05869	2.37851	0	0	0	4.58225	0	0	0	2.04686	4.96612	4.37901	2.8742	5.32679	5.1736	4.18072	0	1.90638	2.39057	4.18861	3.04305	0	0	1.62847	0	0	2.11511	2.47972	1.8907	0	3.70897	3.43109	2.8146	4.13223	0	0	2.28975	1.79206	0	0	0	2.98477	0	3.80963	3.54293	3.69883
Reg4	9.80196	4.88477	4.46274	8.03669	8.55804	10.8148	2.57594	4.77874	7.81257	10.2536	10.5956	8.88254	2.04686	2.25766	8.84507	7.66076	9.02587	4.66074	6.51683	6.58171	10.7792	10.2514	4.18861	4.90541	8.64406	1.71846	10.3443	8.7739	3.02889	9.76052	10.8572	9.5	2.84955	4.86691	3.14222	10.2057	4.34283	9.97695	9.37767	10.0432	3.97989	7.50809	3.43286	7.665	10.4739	4.22603	10.2769	2.66168	4.24627
Car8	0	0	0	0	0	0	0	0	0	0	0	0	0	0	0	0	0	0	0	0	0	0	0	0	0	0	0	0	2.19564	0	0	0	0	0	0	0	0	0	0	0	0	0	0	0	0	0	0	0	0
Klf4	4.44203	0	2.64677	2.04714	4.15381	0	0	0	0	1.55698	0	1.90233	0	3.62603	4.94067	0	3.35166	4.10402	4.36339	1.86111	1.90638	3.246	2.15281	0	4.43908	0	2.37398	0	0	0	4.27139	1.8907	0	2.32933	5.09898	4.00792	2.70309	2.81323	3.74164	0	5.14907	1.60128	0	1.38007	5.00549	3.01534	2.63432	0	3.99836
Elavl2	0	0	0	0	0	0	0	0	0	0	0	0	0	0	0	0	0	0	0	0	0	0	0	0	0	0	0	0	0	0	0	0	0	0	0	0	0	0	0	0	0	0	0	0	0	0	0	0	0
Cyp2j6	0	0	0	0	0	0	0	0	0	0	0	0	0	0	0	0	0	0	0	0	0	0	0	0	0	0	0	2.31332	0	0	0	0	2.84955	0	0	0	0	2.00514	0	0	0	1.60128	0	0	0	0	0	0	0
Cyp2j5	0	0	0	0	0	0	0	0	0	0	0	0	0	0	0	0	0	0	0	0	0	0	0	0	0	0	0	0	0	0	0	0	0	0	0	0	0	0	0	0	0	2.34149	0	3.17217	0	0	0	0	0
Slc5a9	0	0	0	0	0	0	0	0	0	0	2.08699	0	0	0	0	0	0	0	0	0	0	0	0	0	0	0	0	0	0	2.11511	2.47972	0	0	0	0	2.00634	0	0	0	2.28975	0	0	0	1.38007	0	0	0	0	0
Fabp3	1.72423	0	0	0	0	0	0	0	0	0	2.08699	0	0	0	0	0	0	0	0	0	2.69985	0	0	0	0	0	2.86305	0	0	2.11511	0	0	0	0	0	0	0	0	2.3577	4.04953	0	2.34149	0	0	2.1564	0	0	0	0
C1qa	0	0	0	0	0	0	0	0	0	0	0	0	0	0	0	0	0	0	0	0	0	0	0	0	0	0	0	0	0	2.11511	0	1.8907	0	0	0	0	0	0	0	0	0	0	0	0	0	0	0	0	0
Mnx1	0	0	0	0	1.63227	0	0	0	0	0	0	0	0	0	0	1.1804	0	0	0	0	0	0	0	0	0	0	0	0	1.4805	0	0	2.68174	0	0	0	0	0	0	0	0	0	0	3.14395	0	0	0	0	0	0
Alb	0	0	0	0	0	0	0	0	0	0	4.35696	0	0	0	0	1.82081	0	0	0	0	0	0	0	0	0	0	0	0	0	0	0	0	0	0	0	0	0	2.00514	0	2.28975	0	0	0	2.88971	5.00549	0	0	0	0
Hip1	0	0	0	1.35977	0	0	0	0	0	0	0	1.90233	0	0	0	0	0	0	0	0	1.90638	2.39057	0	0	0	0	0	0	0	0	0	2.68174	0	0	0	0	0	0	0	0	0	0	0	0	0	0	0	0	0
Gper1	0	0	0	0	0	0	0	0	0	0	0	0	0	0	2.10474	1.1804	0	0	0	0	0	0	0	0	0	0	0	0	0	0	0	0	0	0	0	0	0	0	0	0	0	0	0	0	0	0	0	0	0
Tac1	3.64618	2.34416	0	1.35977	0	3.50037	0	3.94741	0	0	2.08699	0	0	0	2.10474	0	2.98298	0	0	0	1.90638	3.246	0	0	1.98403	1.71846	1.62847	2.31332	5.13005	4.60441	0	3.5647	0	0	0	2.8146	1.90919	0	0	3.13412	3.73503	0	5.25691	4.64628	0	0	4.61115	0	0
Gstk1	1.72423	0	0	0	0	0	0	1.76746	0	3.13249	4.10794	0	0	0	0	1.1804	1.72337	0	0	0	1.90638	3.246	0	0	0	0	2.37398	0	0	3.459	0	3.86203	0	0	1.56423	0	0	4.00643	0	4.04953	0	0	0	1.38007	0	0	0	0	0
Tril	0	0	0	0	0	0	0	0	0	0	0	0	0	0	0	0	0	0	0	0	0	0	0	0	0	0	0	0	0	0	0	0	0	0	0	0	0	0	0	0	0	0	0	0	0	0	0	0	0
Mgll	0	0	0	0	1.63227	0	0	1.76746	0	0	0	0	2.04686	2.25766	0	0	0	2.67779	1.78571	1.86111	0	2.39057	2.98073	0	1.98403	0	0	0	0	0	0	0	0	2.32933	1.56423	2.00634	0	0	0	0	2.5671	0	0	0	0	0	0	2.66168	1.99869
Gpr27	0	0	0	0	0	0	0	0	0	0	0	0	0	0	0	0	0	1.88728	0	0	0	0	0	0	0	0	0	0	0	0	0	0	0	0	0	0	0	0	0	0	0	0	0	0	0	0	0	0	0
Pzp	0	0	0	0	0	0	0	0	0	0	0	0	0	0	0	0	0	0	0	0	0	0	0	0	0	0	0	0	0	0	0	0	3.74583	0	0	0	0	0	0	0	0	1.60128	0	2.53814	0	0	0	0	0
Iapp	0	0	0	0	0	0	0	0	0	0	0	0	0	0	0	0	0	0	0	0	0	0	0	0	0	0	0	0	0	0	0	0	0	0	0	0	0	0	0	0	0	0	0	0	0	0	0	0	0
Bcam	0	0	0	0	0	0	0	1.76746	0	0	2.08699	2.69518	0	0	0	0	0	0	2.55968	0	0	0	0	0	0	0	0	0	0	0	3.34423	0	0	2.32933	1.56423	0	1.90919	0	0	0	0	0	0	1.38007	0	0	0	0	0
Tgfb1	0	2.34416	0	0	0	0	0	0	2.75248	0	0	0	0	0	0	1.1804	1.72337	0	0	0	0	0	2.98073	0	0	0	0	0	0	0	0	0	0	2.32933	2.29702	0	0	0	0	0	0	0	0	0	0	0	0	0	3.99836
Fxyd5	0	0	0	0	0	0	0	0	0	0	0	0	0	0	0	0	0	0	0	0	0	0	0	0	0	0	0	0	0	0	0	0	0	0	0	0	0	0	0	0	0	0	0	0	0	0	0	0	0
Olfr558	0	0	0	0	0	0	0	0	0	0	0	0	0	0	0	0	0	0	0	0	0	0	0	0	0	0	0	0	0	0	0	0	0	0	0	0	0	0	0	0	0	0	0	0	0	0	0	0	0
Olfr78	0	0	0	0	0	0	0	0	0	0	0	0	0	0	0	0	0	0	0	0	0	0	0	0	0	0	0	0	0	0	0	0	0	0	0	0	0	0	0	0	0	0	0	0	0	0	0	0	0
Lmo1	0	0	0	0	1.63227	0	0	0	0	0	0	0	0	0	0	0	0	0	0	0	0	0	0	0	0	0	0	0	0	0	0	0	0	0	0	0	0	0	0	0	0	0	0	0	0	0	0	0	0
Sct	6.91659	12.342	11.1107	8.31735	7.30834	8.15333	11.5877	11.9509	7.86678	9.22702	6.92122	5.72861	10.9562	9.79735	7.53813	10.2138	8.47378	7.52792	7.30072	7.35965	4.33919	6.79876	9.11883	12.0379	6.96752	10.404	3.51843	8.36865	4.79996	5.10108	5.91916	1.8907	9.51868	10.4738	7.59101	7.03075	10.9451	4.81397	7.30168	5.98266	6.70667	7.26265	5.181	9.66537	6.39218	11.1852	8.10047	9.39294	8.24619
Cd81	3.64618	0	2.64677	2.04714	1.63227	4.0422	0	4.15639	1.9521	1.55698	4.10794	2.69518	0	2.25766	2.92645	2.26279	1.72337	1.88728	2.55968	1.86111	4.5229	2.39057	0	0	0	2.48071	1.62847	2.31332	3.5537	3.84086	0	4.31883	2.84955	3.17814	0	3.70824	2.70309	4.81397	0	2.28975	0	1.60128	1.56553	2.53814	3.89064	0	1.84976	1.87336	1.99869
Cd24a	0	5.0713	2.64677	4.70393	4.3147	0	5.66181	1.76746	1.9521	1.55698	2.90635	1.90233	2.86078	5.13091	4.37901	4.6474	2.98298	4.66074	5.14039	4.28022	2.69985	3.77936	4.65125	5.35165	4.43908	4.83239	1.62847	4.84759	3.75843	2.93819	3.34423	1.8907	0	0	1.56423	2.8146	2.70309	2.00514	4.43481	2.28975	4.53405	0	2.29857	1.38007	0	0	4.61115	4.29623	4.45776
Neurog3	0	0	0	0	0	0	0	0	0	0	0	0	0	0	0	0	0	0	0	0	0	0	0	0	0	0	0	0	0	0	0	0	0	0	0	0	0	0	0	0	0	0	0	0	0	0	0	0	0
Trpm2	0	0	0	2.04714	1.63227	2.62253	0	0	0	2.28828	0	1.90233	0	0	2.10474	1.82081	1.72337	1.88728	1.78571	1.86111	0	2.39057	0	0	1.98403	0	1.62847	0	0	0	0	0	0	3.17814	0	2.8146	0	2.00514	0	2.28975	2.5671	0	0	0	3.50767	0	1.84976	1.87336	0
Onecut3	0	0	0	0	0	0	2.57594	0	0	0	0	0	0	0	0	0	1.72337	0	0	0	0	0	0	2.20825	0	0	0	0	0	0	0	0	3.3662	0	0	0	2.70309	0	0	0	0	2.8283	0	1.38007	0	0	0	0	0
Ascl1	0	0	0	0	0	0	0	0	0	0	0	0	0	0	0	0	0	0	0	0	0	0	0	0	0	0	0	0	0	0	0	0	0	0	0	0	0	0	0	0	0	0	0	0	0	0	0	0	0
Wif1	0	0	0	0	0	0	0	0	0	0	0	0	0	0	0	0	0	2.67779	1.78571	0	0	0	0	0	0	0	0	0	0	0	0	0	0	0	0	0	0	0	0	0	0	0	0	0	0	0	0	0	0
Fgfr1	0	0	0	0	0	0	0	0	0	0	0	0	0	0	0	0	0	0	0	0	0	0	0	0	0	0	0	0	0	0	0	0	0	0	0	0	0	0	0	0	0	0	0	0	0	0	0	0	0
Npy1r	2.4875	0	0	0	0	0	0	0	0	0	0	0	0	0	0	0	0	0	0	0	0	0	0	0	0	0	0	0	0	0	0	0	0	0	0	0	0	0	0	0	0	0	1.56553	0	0	0	0	0	0
Ces3a	0	0	0	0	0	0	0	0	0	0	2.08699	1.90233	0	0	0	0	2.48649	0	0	0	1.90638	0	0	0	0	0	0	0	0	3.459	0	1.8907	0	0	0	0	0	3.70677	2.3577	0	0	0	0	0	0	0	0	0	0
Cpb2	0	0	0	0	0	0	0	0	0	1.55698	0	0	0	0	0	0	0	0	0	0	0	2.39057	0	0	0	0	0	0	0	0	0	0	0	0	0	0	0	0	2.3577	0	0	0	0	0	0	0	0	0	0
Mmp7	1.72423	0	0	0	0	0	0	0	0	0	0	0	0	0	0	0	0	0	0	0	0	0	0	0	0	0	0	0	0	0	0	0	0	0	0	0	0	0	0	0	0	0	0	0	0	0	0	0	0
Elavl3	0	0	0	0	0	0	0	0	0	0	0	0	0	0	0	0	0	1.88728	0	0	1.90638	0	0	0	0	0	0	0	0	0	0	0	0	0	0	0	0	0	0	0	0	0	0	0	0	0	0	0	0
Fxyd6	0	0	0	0	0	0	0	1.76746	0	0	2.08699	1.90233	0	0	0	0	0	0	1.78571	0	2.69985	0	0	0	1.98403	2.97683	1.62847	0	1.4805	2.11511	0	2.68174	0	0	0	2.00634	1.90919	2.81323	0	2.28975	0	0	1.56553	1.38007	0	0	4.05541	0	0
Ltf	0	0	0	0	0	0	0	0	0	1.55698	2.08699	0	0	0	0	0	0	0	0	0	0	0	0	0	0	0	0	0	0	0	0	0	0	0	0	0	0	0	0	0	0	0	0	0	0	0	0	0	0
Cck	3.64618	3.19461	4.06935	2.04714	0	4.0422	2.57594	9.84477	2.75248	2.28828	5.97093	0	2.04686	4.01156	3.44673	2.60065	3.88873	0	3.06068	2.64749	3.20884	4.16789	3.50345	3.04305	1.98403	2.97683	1.62847	3.16036	4.24066	2.93819	3.88105	1.8907	10.3867	2.32933	5.01414	3.32953	1.90919	2.00514	0	2.28975	1.79206	10.9139	2.29857	9.53117	2.98477	2.18357	0	1.87336	2.80586
Gpx3	3.88988	4.11359	4.77152	4.1883	4.7115	5.85153	5.79672	6.73877	0	4.81728	4.56926	4.68053	5.8424	4.96612	4.12978	5.5022	4.27921	3.18557	4.92479	3.8242	4.83222	6.01469	5.40474	5.47424	4.43908	4.57945	3.51843	4.38207	1.4805	5.8492	5.04637	3.86203	2.84955	6.03147	5.09898	4.46749	4.68951	6.25469	5.25285	6.06878	3.06855	4.7784	2.29857	4.33868	5.72438	4.47616	5.22735	4.78861	3.99836
Neurod2	0	0	0	0	0	0	0	0	0	0	0	0	0	0	0	0	0	0	0	0	0	0	0	0	0	1.71846	0	0	0	0	0	0	0	0	0	0	0	0	0	0	0	0	0	0	0	0	0	0	0
Milr1	0	0	0	0	0	0	0	0	0	1.55698	0	0	0	0	0	0	0	0	0	0	0	0	0	0	1.98403	0	0	0	0	0	0	0	0	0	0	0	0	0	0	3.13412	0	1.60128	0	0	0	0	0	0	0
Foxj1	1.72423	0	0	0	0	0	0	0	0	0	0	0	0	0	0	0	0	0	0	0	0	0	0	0	0	0	0	0	0	0	0	0	0	0	0	0	0	0	0	0	0	0	0	0	0	0	0	0	0
Ucn3	4.58738	0	0	1.35977	0	0	0	0	0	1.55698	2.90635	1.90233	0	0	0	1.82081	0	0	0	1.86111	2.69985	0	0	0	0	0	4.70609	0	0	3.84086	3.34423	1.8907	0	0	0	2.00634	0	0	0	4.60515	0	2.34149	0	0	2.1564	0	1.84976	0	0
Nrsn1	0	0	0	0	0	0	0	0	0	0	0	0	0	0	0	0	0	0	0	0	0	0	0	0	0	0	0	0	0	0	0	0	0	0	0	0	0	0	0	0	0	0	0	0	0	0	0	0	0
Foxq1	0	0	0	0	1.63227	0	0	0	1.9521	0	0	0	4.05834	2.25766	0	0	3.88873	0	0	2.64749	0	0	0	4.90541	0	1.71846	0	0	0	0	0	0	0	0	0	0	3.58783	0	0	0	3.73503	0	0	3.17217	0	2.18357	0	0	0
Nrn1	0	0	0	0	1.63227	0	0	0	0	0	0	0	0	0	0	0	0	0	0	0	0	0	0	0	0	0	0	0	0	0	0	0	0	0	0	0	0	0	0	0	0	0	0	0	0	0	0	0	0
Cartpt	0	2.34416	0	2.86111	4.7115	0	0	0	2.75248	1.55698	0	1.90233	0	0	5.34392	1.82081	0	6.20717	0	1.86111	0	3.77936	5.81124	0	4.22773	2.48071	0	0	0	0	2.47972	0	0	5.36657	4.61391	4.8155	1.90919	0	0	0	0	0	0	1.38007	0	2.18357	4.88989	0	0
Ankrd55	0	0	0	0	0	0	0	0	0	0	0	0	0	0	0	0	0	0	0	1.86111	2.69985	0	0	0	0	0	3.76033	0	0	0	2.47972	1.8907	0	0	0	0	0	2.00514	0	0	0	1.60128	0	1.38007	2.1564	0	1.84976	0	0
Isl1	0	0	0	0	0	0	0	0	0	0	0	0	0	0	0	0	0	0	0	0	0	0	0	0	0	0	0	0	0	0	0	0	0	0	0	0	0	0	0	0	0	0	0	1.38007	0	0	0	0	0
Rtn1	0	0	0	0	0	0	0	0	0	0	0	0	0	0	0	0	0	0	0	0	0	0	0	0	0	0	0	0	0	0	0	0	0	0	0	0	0	0	0	0	0	0	0	0	0	0	0	0	0
Serpina1c	0	0	0	3.58075	4.7115	0	3.44959	0	3.93987	0	0	0	2.04686	0	0	3.7723	3.88873	3.18557	4.36339	3.52751	1.90638	0	4.4384	0	5.1887	0	0	5.19898	0	0	5.68249	0	2.03699	3.17814	3.87779	0	0	0	0	3.13412	2.5671	0	0	0	0	0	0	0	0
Serpina1e	0	2.34416	0	2.51079	3.52356	2.62253	4.382	0	3.26425	0	0	0	4.05834	0	2.10474	3.10406	3.35166	2.67779	3.06068	3.8242	1.90638	0	4.18861	2.20825	2.78909	0	0	3.16036	0	0	4.27139	0	0	3.70897	1.56423	4.00792	0	0	0	0	1.79206	0	0	2.07231	0	0	0	0	3.99836
Vipr2	0	0	0	0	0	0	0	0	0	0	0	0	0	0	0	0	0	0	0	0	0	0	0	0	0	0	0	0	0	0	0	0	0	0	0	0	0	0	0	0	0	0	0	0	0	0	0	0	0
Acvrl1	1.72423	0	0	0	0	0	0	0	0	0	0	0	0	0	0	1.1804	0	0	0	0	0	0	0	0	1.98403	0	2.37398	2.31332	0	2.11511	0	0	0	0	1.56423	2.8146	0	2.00514	0	0	0	0	0	0	0	0	0	0	0
Krt7	4.84038	3.19461	3.52673	5.08301	4.926	4.74371	3.44959	3.03802	3.93987	5.31642	3.4257	3.87685	4.51881	5.27879	3.82831	4.97239	4.83919	4.93984	3.97153	4.07015	4.5229	3.246	4.65125	3.95276	4.43908	3.34531	3.96743	5.48133	2.6716	2.93819	0	0	2.03699	4.65273	3.67166	4.25593	4.68951	2.00514	4.68668	4.04953	3.97989	1.60128	2.78232	2.88971	3.50767	2.18357	5.01136	2.66168	5.32023
Shisa9	0	0	3.52673	1.35977	1.63227	2.62253	2.57594	0	0	0	2.08699	0	2.86078	0	0	1.82081	1.72337	0	1.78571	1.86111	1.90638	0	0	2.20825	1.98403	0	0	0	0	0	0	0	0	0	2.29702	0	1.90919	0	3.74164	0	0	0	0	0	0	0	1.84976	1.87336	0
Casr	0	0	0	0	0	0	0	0	0	0	0	0	0	0	0	0	0	0	0	0	0	0	0	0	0	0	0	0	0	0	0	0	0	0	0	0	0	0	0	0	0	0	0	0	0	0	0	0	0
Robo2	0	0	0	0	0	0	0	0	0	0	0	0	0	0	0	0	0	0	0	0	0	0	0	0	0	0	0	0	0	0	0	0	0	0	0	0	0	0	0	0	0	0	0	0	0	0	0	0	0
Pde10a	0	0	0	0	0	0	0	0	0	0	0	0	0	0	0	0	0	0	0	0	0	0	0	0	0	0	0	0	0	0	0	0	0	0	0	0	0	0	0	0	0	0	0	0	0	0	0	0	0
Qpct	0	2.34416	0	0	0	0	0	0	0	0	0	0	0	0	0	0	0	0	0	0	0	0	0	0	0	0	0	0	0	0	0	0	0	0	0	0	0	0	0	0	0	2.34149	0	0	0	0	0	0	0
Nrxn1	0	0	0	0	0	0	0	0	0	0	0	0	0	0	0	0	0	0	0	0	0	0	0	0	0	0	0	0	0	0	0	0	0	0	0	0	0	0	0	0	0	0	0	0	0	0	0	0	0
Piezo2	0	0	0	0	0	0	0	0	0	0	0	0	0	0	0	0	0	0	0	0	0	0	0	0	0	0	0	0	0	0	0	0	0	0	0	0	0	0	0	0	0	0	0	0	0	0	0	0	0
Mc4r	0	0	0	0	0	0	0	0	0	0	0	0	0	2.25766	0	0	0	0	0	0	0	0	0	0	0	0	0	0	0	0	0	0	0	0	1.56423	0	0	0	0	0	0	0	0	0	0	0	0	0	0
Cidea	0	0	0	0	0	0	0	0	0	0	0	2.69518	0	0	2.10474	1.82081	1.72337	0	0	0	1.90638	0	0	0	0	0	3.22764	0	0	0	0	0	0	0	0	0	0	2.81323	0	2.28975	0	0	0	0	0	0	3.51319	0	0
Syt7	0	0	0	2.86111	1.63227	0	3.98985	1.76746	3.26425	2.28828	0	0	2.86078	2.25766	2.92645	0	2.98298	3.56041	1.78571	0	0	2.39057	2.15281	2.20825	2.78909	2.48071	1.62847	0	1.4805	0	2.47972	0	0	0	2.78065	4.46749	2.70309	0	0	0	1.79206	0	0	1.38007	0	0	0	3.16857	3.69883
Lrrc10b	0	0	0	0	0	0	0	0	0	0	0	0	0	0	0	0	0	0	0	0	0	0	0	2.20825	0	0	0	0	0	0	0	0	0	0	0	0	0	0	2.3577	0	1.79206	0	0	0	0	0	0	0	0
Rbp4	0	0	0	0	0	0	0	4.50086	0	0	2.08699	0	0	0	0	0	0	0	0	0	0	0	0	0	0	0	0	0	0	0	0	0	5.25726	0	1.56423	0	0	0	0	0	0	2.34149	0	4.08984	0	0	0	0	0
Cells are annotated with barcode and '_cluster' as described in the manuscript
e.g. AAACCTGAGAGGTTGC-2_4: cell identified in cluster 4
[truncated: 3,477 more columns]

## Sheet: Source data Fig5 Supp 1
S Fig 7a serum serotonin
untreated			saline			CNO
wt	LSL-CHRM3*	Piezo2-CHRM3*	wt	LSL-CHRM3*	Piezo2-CHRM3*	wt	LSL-CHRM3*	Piezo2-CHRM3*
1857.81	2058.29	1958.59	1657.81	1857.38	1958.93	1936.48	18274	4530.94
1757.73	1958.93	1757.23	1859.36	2058.57	1757.81	1775.94	1937.55	3910.93
1963.36	1757.38	1958.93	1937.89	1958.52	1857.28	2015.93	2025.84	3750.28
S Fig 7c total serotonin level
dc+	dc-	pc-	dd-
3.95076	1.27268	0.831988	1.00319
5.08073	0.818665	0.944503	1.09441
4.64375	0.970265	0.866579	0.991468
5.38422	0.887358	0.818748	0.910941
S Fig 7d setonotonin secretion in response to CNO (mCitrine+/EpCam+)
saline	CNO
0.9813	1.92827
0.863487	2.11799
1.04648	1.67532
1.10873	1.80671
S Fig 7e setonotonin secretion in response to CNO (mCitrine-/EpCam+)
saline	CNO
1.018	1.06551
0.894848	1.00293
1.02363	0.992514
1.06352	0.939051
S Fig 7f BEA
	WT						Piezo2-CHRM3*
CNO	10.3	11.7	7.2	8.9	6.2	9.3	1.3	0.94	1.8	2.1	0.85	2.3
saline	5.8	11.2	8.5	7.2	9.6	10.2	9.3	10.2	7.4	6.1	8.6	11.2
untreated	4.9	7.3	10.2	6.5	8.6	9.3	10.4	9.1	5.5	6.7	7.2	8.3
