# Supplementary material for: Stratification of enterochromaffin cells by single-cell expression analysis
Source: eLife. 2025 Apr 4;12:RP90596. doi: 10.7554/eLife.90596 (PMC11970908; doi:10.7554/eLife.90596)
Supplement: Figure 5—source data 1. [file elife-90596-fig5-data1.xlsx]

## Sheet: Source data Fig 5
qPCR of indicated genes in GFP+ or GFP- cells from indicated regions of gut (Tph1-bacTRAP)
	Tph1			Chga			Trpa1			Trpm2			Cartpt-2			Ucn3			Il12a			Foxj1			Ascl1			Piezo2-1			Piezo2-2
dd-	1.102	0.993	0.985	0.998881	1.02836	0.999839	1.00013	1	0.999781	0.999922	1	1.08392	1	1	1	1	0.998881	1.0028	1	1.00013	1	1	0.999922	1	1.00028	1	0.999922	1	1	1	1	1	1
dd+	5818.62	5228.36	5580.19	2230.79	2013.78	1983.78	346.283	301.284	298.374	164.007	183.837	140.283	1440.12	1203.18	1302.28	405.671	369.049	330.39	0.200406	0.483947	0.726395	1.19991	1.00284	2.18294	0.214641	0.573846	0.745263	0.200406	0.87263	0.374826	0.200406	0.283644	0.648298
jj-	1.085	0.9472	1.001	0.998881	1.02836	0.999839	1.00013	1	0.999781	0.999922	1	1.08392	1	1	1	1	0.998881	1.0028	1	1.00013	1	1	0.999922	1	1.00028	1	0.999922	1	1	1	1	1	1
jj+	4818.62	5028.36	5180.19	2030.79	2013.78	1809.78	246.283	290.284	278.374	134.007	153.837	110.283	1040.12	903.182	802.284	485.671	469.049	390.39	0.300406	0.483947	0.926395	1.19991	1.10284	2.58294	0.214641	0.573846	0.745263	0.300406	0.87263	0.974826	0.400406	0.583644	0.648298
pc-	1.06171	1.26171	0.861715	0.421373	0.621373	0.821373	0.0289586	0.0989586	0.0389586	0.234268	0.134268	0.0342679	0.36263	0.16263	0.27263	0.16263	0.13263	0.0626301	0.13263	0.0626301	0.026301	0.144215	0.0442147	0.234215	0.142659	0.0426592	0.122659	0.16263	0.0626301	0.12263	0.16263	0.0626301	0.0226301
pc+	3553.37	3853.37	4053.37	2031.78	2531.78	2831.78	0.181999	0.281999	0.481999	2.80536	1.90536	1.60536	10.8774	8.09774	15.8774	0.836472	1.01536	1.77972	72.3743	52.3933	46.2193	5.39754	7.39754	9.84575	13.3048	17.4024	15.2413	0.938417	0.759168	1.29308	1.63675	0.394051	0.636751
dc-	0.389263	0.294635	0.394849	0.790388	0.515748	0.902875	0.123405	0.0944384	0.90344	0.192917	0.0932837	0.0591707	0.519529	0.634851	0.294635	0.485195	0.634839	0.294635	1.29463	0.983948	0.294635	0.429375	1.12498	0.212421	1.21242	0.42125	0.938448	1.29463	1.9375	0.938476	0.394635	0.485195	0.944852
dc+	4140.01	3940.43	3540.24	1755.74	1253.34	1583.87	1.41225	2.34254	0.983225	1.63605	2.01636	1.66048	1.96186	2.16186	1.37496	1.19619	2.18563	2.93846	3.63742	2.19619	1.96186	54.9008	74.7884	84.3741	105.549	145.755	121.938	353.038	385.976	405.594	257.588	301.075	238.075
fecal pellet assay
Piezo2-CHRM3	WT		Piezo2-CHRM3	WT		Piezo2-CHRM3	WT
2	0		2	0		0	0
3	1		4	0		1	1
3	0		3	2		3	0
4	1		4	0		2	2
1	0		0	1		4	1
3	2		2	0		1	0
2	0		3	2		0	2
4	0		1	0		1	0
3	1		3	1		2	1
0	0		3	0		0	0
Beads explusion assay
Piezo2-CHRM3	WT		Piezo2-CHRM3	WT		Piezo2-CHRM3	WT
1.28	8.23		0.65	11.3		3.42	8.5
4.37	7.93		3.14	8.53		1.25	9.6
0.63	10.9		0.73	6.5		0.84	10.3
0.5	7		1.2	12.5		4.35	12.4
1	8.28		2.5	13.4		2.14	8.55
0.75	4.92		4.3	5.4		3.4	7.43
0.58	5.45		0.55	7.4		5.3	10.9
0.84	5.22		1.03	8.03		0.68	11.4
1.33	9.2		0.95	5.6		1.25	6.4
0.67	7.85		2.31	9.45		0.85	8.35
serum serotonine
D1	D2	Saline		D1	D2	Saline
3854.38	4211.41	1957.81		4103.37	4083.37	1897.3
4577.44	3510.23	1958.57		3974.84	3890.48	2094.38
3807.11	3940.15	1718.19		4274.38	4213.39	1983.84
