# Supplementary material for: Stratification of enterochromaffin cells by single-cell expression analysis
Source: eLife. 2025 Apr 4;12:RP90596. doi: 10.7554/eLife.90596 (PMC11970908; doi:10.7554/eLife.90596)
Supplement: Figure 6—figure supplement 1—source data 1. [file elife-90596-fig6-figsupp1-data1.xlsx]

## Sheet: Fig 6 Suppl Source data
S Fig 8f BEA
	Piezo2-DTR	WT	LSL-DTR
	41.6	8.28	10.4
	21.3	4.92	5.4
	35.7	5.4	7.3
	60	11.2	10.2
	38.2	8.5	11.4
	39.5	9.4	8.5
S Fig 8g Gastric empty
	w/ DT								w/o DT
Piezo2-DTR	55.7324	51.5344	48.7272	46.4947	65.0991	61.6195	58.3687	64.7839	59.3692	62.8837	52.3685	60.7383	70.7348	58.9015	63.9273	67.2537
WT	66.065	51.6715	71.6913	70.6909	59.9057	63.8476	58.0289	62.8946	69.0948	53.8367	72.0284	63.3629	59.0383	62.9036	52.0949	56.8394
S Fig 8h Small intestine transit
	w/ DT								w/o DT
Piezo2-DTR	2.04186	2.46252	1.86076	1.83377	1.74143	2.58936	2.35374	1.80749	2.99375	2.78939	2.19034	1.98304	2.09177	2.64835	2.40374	2.65481
WT	2.75042	2.63645	2.74337	3.09301	2.46938	2.56482	1.86381	2.05364	2.56487	3.17183	1.90365	2.80836	2.30385	1.98035	2.41635	2.96384
