# Supplementary material for: Stratification of enterochromaffin cells by single-cell expression analysis
Source: eLife. 2025 Apr 4;12:RP90596. doi: 10.7554/eLife.90596 (PMC11970908; doi:10.7554/eLife.90596)
Supplement: Figure 6—source data 1. [file elife-90596-fig6-data1.xlsx]

## Sheet: Source data Fig 6
smRNA-FISH counting of Piezo2 after DT administration
	PD			WT
caudal dist. cl	18.2648	7.11744	6.64452	93.0233	96.7742	103.306
rostral dist. cl	26.0417	28.169	25.7732	89.7436	100	114.811
prox. cl	126.087	145.455	132.231	144.385	134.783	128
Fig 6e. FPA
	Piezo2-DTR	WT		Piezo2-DTR	WT		Piezo2-DTR	WT		Piezo2-DTR	WT
	5	13		9	14		7	8		8	17
	11	15		8	15		10	12		6	13
	7	11		10	11		9	7		10	8
	3	7		6	8		6	11		7	10
	12	10		11	7		8	13		12	12
	8	12		5	13		10	9		10	9
	6	9		7	12		11	14		9	11
	5	7		7	8		6	9		8	10
	7	12		10	10		5	11		11	14
	6	14		8	9		7			9
Fig 6f BEA after DT
	Piezo2-DTR	WT		Piezo2-DTR	WT		Piezo2-DTR	WT		Piezo2-DTR	WT
	60	4.8		25.4	7.4		35.8	5.8		30.2	10.4
	60	10.4		27.5	5.6		40.5	10.2		25.3	12.4
	43.8	5.4		45.6	6.8		55.2	7.4		60	9.3
	41.6	8.6		60	11		28.4	12.5		55.4	6.5
	21.3	9.6		35.3	9.8		60	7.5		18.5	7.3
	20.7	8		15.4	12.4		13.4	8.4		22.4	12.4
	14.7	8.1		27.4	13.2		21.4	12.5		43.2	8.9
	11.5	10.4		16.9	4.6		18.4	13		32.3	9.5
	60	9.7		60	6.4		53.2	9.5		13.2	13.4
	35.7	6.8		52.4	7.3		33.5	9.2		14.5	8.5
Fig 6g Gastric empty assay after DT
	Piezo2-DTR	WT		Piezo2-DTR	WT		Piezo2-DTR	WT
	55.7324	66.065		48.3749	55.8933		53.0386	50.4679
	51.5344	61.6715		55.385	64.5876		73.5867	64.8574
	48.7272	71.6913		70.2785	72.3746		64.5871	59.7487
	46.4947	76.6909		67.8494	64.8573		69.0537	63.8496
	70.0991	59.9057		58.3846	57.4658		58.4768	70.1921
	71.6195	63.8476		64.5782	58.9374		52.6784	73.8577
	58.3687	58.0289		72.4756	73.4759		68.5765	56.3847
	64.7839	62.8946		63.4836	72.4675		67.4454	62.3755
	57.8364	72.2837		57.3817	59.0375		70.3808	68.4757
	66.3745	67.0936		58.9307	65.4756		72.3647	57.9486
Fig 6h. small intestine transit after DT
	Piezo2-DTR	WT		Piezo2-DTR	WT		Piezo2-DTR	WT
	2.34186	2.75042		1.98375	2.89385		1.92838	2.64746
	2.56252	2.63645		2.03749	2.93848		2.03857	2.55647
	1.96076	2.74337		2.48874	1.93278		2.23749	2.08376
	1.83377	3.09301		1.78375	2.17389		2.4824	1.83766
	1.74143	2.26938		1.93749	2.38477		1.84986	2.03749
	2.58936	2.56482		2.37264	2.63848		1.93848	2.27385
	2.15374	1.96381		2.02637	1.82376		2.17265	2.64776
	1.93748	2.35364		2.33948	2.29384		2.03847	2.87705
	2.4892	2.92038		2.09284	2.53759		2.34577	3.09476
	2.77462	2.83746		1.98374	2.62385		1.99875	2.18377
Fig. 6i whole gut transit after DT
	Piezo2-DTR+DT	WT+DT		Piezo2-DTR+DT	WT+DT		Piezo2-DTR+DT	WT+DT
	215	150		184	124		173	137
	172	135		193	145		154	154
	170	125		175	134		158	147
	171	140		163	130		163	138
	206	128		145	137		148	142
	162	142		159	140		178	129
	169			164			182	154
	176			183			165
	183			168			196
	194			148			170
		4.84158e-05			0.000267621			0.000816493
