# Supplementary material for: Stratification of enterochromaffin cells by single-cell expression analysis
Source: eLife. 2025 Apr 4;12:RP90596. doi: 10.7554/eLife.90596 (PMC11970908; doi:10.7554/eLife.90596)
Supplement: Figure 7—figure supplement 1—source data 1. [file elife-90596-fig7-figsupp1-data1.xlsx]

## Sheet: Fig 7 Suppl Source data
S Fig. 9a Contingency table
	Piezo2fl/fl	Piezo2 cko_healthy	Piezo2 cko_runt
male	20	21	3
female	18	17	4
S Fig. 9d Small intestine length				colon length
Piezo2fl/fl	Piezo cko			Piezo2fl/fl	Piezo cko
33.5	33.6			7.5	7.8
34.7	32.8			7.2	8.5
34.2	34.6			8.3	8.4
35.5	35			9	9.1
35.2	35.5			8.5	7.9
32.9	33.2			9.2	9.3
S Fig 9g	lysate serotonin
	Piezo2fl/fl				Piezo2_cko
dd	1.08038	0.850694	0.918924	1.15	1.10278	0.641319	0.856597	1.1684
jj	0.673385	0.439809	0.538837	0.494097	0.66283	0.796337	0.614271	0.563021
pc	1.55556	1.77674	1.95035	1.60347	1.32587	1.44497	1.58646	1.79913
dc	0.900347	0.615278	0.752951	0.908681	0.861667	0.811858	0.712326	0.663715
S Fig 9h	serum serotonin
fl/fl	cko
1.04732	0.998606
0.966958	1.0389
0.985721	1.13809
	0.957334
	0.854701
	0.868085
S Fig 9k	SI travel length
fl/fl	cko
97.006	93.9759
96.875	97.1182
100	94.4134
94.9438	100
94.2363	94.0678
