# Supplementary material for: Stratification of enterochromaffin cells by single-cell expression analysis
Source: eLife. 2025 Apr 4;12:RP90596. doi: 10.7554/eLife.90596 (PMC11970908; doi:10.7554/eLife.90596)
Supplement: Figure 7—source data 1. [file elife-90596-fig7-data1.xlsx]

## Sheet: Source data Fig 7
Fig 7a,c S Fig 9f
Piezo2 qPCR
	Piezo2fl/fl				Piezo2_cko
dd	1.1023	0.9873	1.0364	0.93092	1.05	0.95	1.2	1.15
jj	0.874	0.4763	0.7893	0.763	0.6738	0.7483	0.9845	0.495
pc	2.3674	3.173	4.984	5.8901	2.3716	3.583	4.7391	5.374
dc	77.829	71.283	69.738	62.3374	17.8394	15.3781	18.4732	9.038
Tph1 qPCR
	Piezo2fl/fl				Piezo2_cko
dd	1	1.2	0.94	1.13	1.013	0.9173	1.102	0.932
jj	0.384	0.2921	0.436	0.419	0.3256	0.3624	0.534	0.503
pc	3.659	4.679	6.1444	4.893	6.373	6.28	4.732	5.023
dc	0.4605	0.5893	0.673	0.526	0.482	0.546	0.586	0.5283
Chga qPCR
	Piezo2fl/fl				Piezo2_cko
dd	1	0.998	1.08	0.963	1.08	1.04	0.93	0.9623
jj	0.5934	0.6253	0.571	0.602	0.701	0.615	0.672	0.603
pc	3.536	3.243	2.784	4.758	2.893	4.523	3.462	3.537
dc	0.4773	0.674	0.735	0.835	0.563	0.735	1.021	0.673
Fig 7 d
	fl/fl										dko
female	6.8	10.9	8.6	9.3	7.7	10.2					10.2	30.5	45.3	52.3	55.8	13.2	46.3	12.7	24.4
male	6.4	8.8	11.1	7.4	12.3	9.5					60	15.2	14.2	58.5	14.8	43.5	35.4	28.3
female	8.5	6.4	10.3	13.5	6.8	9.5					15.6	29.5	55.3	60	42.3	17.5	19	32	32
male	11.4	9.2	7.5	5.8	10.3	8.5					25.7	32	18.5	60	18.4	54.8	26.8
Fig 7e
	fl/fl										cko
female	158	141	160	125	138	134					168	192	167	158	185	154	196	182	175	195	157
male	155	138	134	165	140	147					165	171	175	204	186	203	195	158
female	138	146	158	150	172	152	155				152	170	166	187	198	175	197	174	203
male	151	139	147	152	146	158	164				165	159	180	197	204	201	185	176
Fig 7g
fl/fl	cko			fl/fl	cko
68.1818	49.3151			65.1818	50.3333
70.1493	43.8356			76.7778	46.7778
77.7778	52.7778			73.4647	53.8477
75	50.7246			62.3339	48.6667
69.5652	59.4203
